# Supplementary material for: Mocapy++ - A toolkit for inference and learning in dynamic Bayesian networks
Source: Springer Nature journal article supplement (doi:10.1186/1471-2105-11-126), 2010-03-12

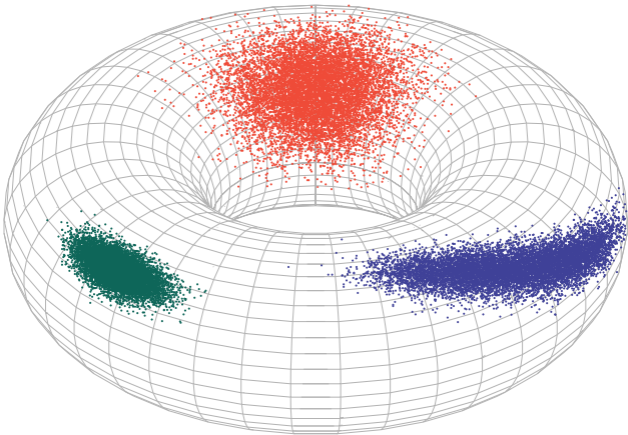

Supplement: 12859_2009_3583_MOESM3_ESM.pdf [file 12859_2009_3583_MOESM3_ESM.pdf]
